# Supplementary material for: Re-Examination of the Phylogenetic Relationship among Merulinidae Subclades in Non-Reefal Coral Communities of Northeastern Taiwan
Source: MDPI journal article supplement (doi:10.3390/d14020144), 2022-02-17
Supplement: s1 [file s1]

Table S1: Species and DNA sequences examined in this study. The species name in Huang et al. 2011 was updated according to World Register of Marine Species (WoRMs). GenBank accession numbers are displayed for each molecular marker (28S rDNA, histone H3, ITS rDNA and mt COI). N.D.: sequences were failed from PCR. Accession date of 28S rDNA sequences: 21-FEB-2011 [16], 26-OCT-2021 (This study); histone H3: 25-JUL-2016 [16], 23-NOV-2021 (This study); ITS rDNA: 21-FEB-2011 [16], 04-DEC-2021 (This study); mt COI: 25-JUL-2016 [16], 25-OCT-2021 (This study).

| No. | Species                      | Sample ID | 28S rDNA | histone H3 | ITS rDNA | mt COI   | Reference  |
|-----|------------------------------|-----------|----------|------------|----------|----------|------------|
| 1   | <i>Astrea curta</i>          | G61882    | HQ203483 | HQ203604   | HQ203370 | HQ203285 | [16]       |
| 2   | <i>Astrea curta</i>          | P122      | HQ203484 | HQ203605   |          | HQ203286 | [16]       |
| 3   | <i>Astrea curta</i>          | 4715K143  | OK586177 | OK556580   | OL670813 | OK576101 | This study |
| 4   | <i>Astrea curta</i>          | 6723R1    | OK586178 | OK556581   | OL670814 | OK576102 | This study |
| 5   | <i>Astrea curta</i>          | 4715K145  | OK586179 | OK556582   | OL670815 | OK576103 | This study |
| 6   | <i>Astrea curta</i>          | 4715K137  | OK586180 | OK556583   | OL670816 | N.D.     | This study |
| 7   | <i>Astrea curta</i>          | 582R1     | OK586181 | OK556584   | OL670817 | OK576104 | This study |
| 8   | <i>Astrea annuligera</i>     | P117      | HQ203481 | HQ203602   | HQ203369 |          | [16]       |
| 9   | <i>Astrea annuligera</i>     | 471T18    | OK586191 | OK556593   | OL670826 | OK576114 | This study |
| 10  | <i>Caulastrea echinulata</i> | S041      | HQ203401 | HQ203522   |          | FJ345414 | [16]       |
| 11  | <i>Caulastrea furcata</i>    | P108      | HQ203402 | HQ203523   |          | HQ203248 | [16]       |
| 12  | <i>Caulastrea tumida</i>     | G61875    | HQ203403 | HQ203524   | HQ203310 | HQ203249 | [16]       |
| 13  | <i>Coelastrea aspera</i>     | S107      | HQ203458 | HQ203579   | HQ203354 | FJ345430 | [16]       |
| 14  | <i>Coelastrea aspera</i>     | 471T12    | OK586227 | OK556626   | OL670862 | OK576149 | This study |
| 15  | <i>Coelastrea aspera</i>     | 471T9     | OK586228 | OK556627   | N.D.     | N.D.     | This study |
| 16  | <i>Coelastrea palauensis</i> | S021      | HQ203466 | HQ203587   | HQ203359 | EU371699 | [16]       |

| No. | Species                         | Sample ID | 28S rDNA | histone H3 | ITS rDNA | mt COI   | Reference  |
|-----|---------------------------------|-----------|----------|------------|----------|----------|------------|
| 17  | <i>Coelastrea palauensis</i>    | 471T2     | OK586229 | N.D.       | N.D.     | OK576150 | This study |
| 18  | <i>Cyphastrea chalcidicum</i>   | G61902    | HQ203404 | HQ203525   | HQ203311 | HQ203250 | [16]       |
| 20  | <i>Cyphastrea chalcidicum</i>   | S103      | HQ203405 | HQ203526   | HQ203312 | FJ345415 | [16]       |
| 21  | <i>Cyphastrea chalcidicum</i>   | 6823R2    | OK586182 | OK556585   | OL670818 | OK576105 | This study |
| 22  | <i>Cyphastrea chalcidicum</i>   | 6823R3    | OK586183 | OK556586   | OL670819 | OK576106 | This study |
| 23  | <i>Cyphastrea microphthalma</i> | S069      | HQ203406 | HQ203527   |          | FJ345416 | [16]       |
| 24  | <i>Cyphastrea serailia</i>      | G61889    | HQ203407 | HQ203528   | HQ203313 | HQ203251 | [16]       |
| 25  | <i>Cyphastrea serailia</i>      | S024      | HQ203408 | HQ203529   | HQ203314 | EU371659 | [16]       |
| 26  | <i>Cyphastrea serailia</i>      | P120      | HQ203409 | HQ203530   |          | HQ203252 | [16]       |
| 27  | <i>Dipsastraea amicornum</i>    | S047      | HQ203400 | HQ203521   | HQ203309 | FJ345412 | [16]       |
| 28  | <i>Dipsastraea danai</i>        | G61885    | HQ203416 | HQ203537   | HQ203321 |          | [16]       |
| 29  | <i>Dipsastraea danai</i>        | S092      | HQ203417 | HQ203538   |          | EU371663 | [16]       |
| 30  | <i>Dipsastraea favus</i>        | G61880    | HQ203418 | HQ203539   | HQ203322 | HQ203255 | [16]       |
| 31  | <i>Dipsastraea favus</i>        | G61915    | HQ203419 | HQ203540   | HQ203323 | HQ203256 | [16]       |
| 32  | <i>Dipsastraea favus</i>        | S003      | HQ203420 | HQ203541   | HQ203324 | EU371710 | [16]       |
| 33  | <i>Dipsastraea favus</i>        | S025      | HQ203421 | HQ203542   |          | EU371664 | [16]       |
| 34  | <i>Dipsastraea favus</i>        | S040      | HQ203422 | HQ203543   | HQ203325 | EU371665 | [16]       |
| 35  | <i>Dipsastraea favus</i>        | P105      | HQ203423 | HQ203544   |          | HQ203257 | [16]       |
| 36  | <i>Dipsastraea favus</i>        | 471T4     | OK586184 | OK556587   | OL670820 | OK576107 | This study |
| 37  | <i>Dipsastraea favus</i>        | 471T10    | OK586185 | OK556588   | OL670821 | OK576108 | This study |

| No. | Species                         | Sample ID | 28S rDNA | histone H3 | ITS rDNA | mt COI   | Reference  |
|-----|---------------------------------|-----------|----------|------------|----------|----------|------------|
| 38  | <i>Dipsastraea favus</i>        | 6821R6    | OK586186 | OK556589   | OL670822 | OK576109 | This study |
| 39  | <i>Dipsastraea favus</i>        | 6821R5    | OK586187 | OK556590   | N.D.     | OK576110 | This study |
| 40  | <i>Dipsastraea cf. laxa</i>     | S013      | HQ203424 | HQ203545   |          | EU371707 | [16]       |
| 41  | <i>Dipsastraea cf. laxa</i>     | S014      | HQ203425 | HQ203546   | HQ203326 | EU371708 | [16]       |
| 42  | <i>Dipsastraea lizardensis</i>  | G61872    | HQ203426 | HQ203547   | HQ203327 |          | [16]       |
| 43  | <i>Dipsastraea lizardensis</i>  | S072      | HQ203427 | HQ203548   | HQ203328 | EU371668 | [16]       |
| 44  | <i>Dipsastraea lizardensis</i>  | P136      | HQ203428 | HQ203549   |          |          | [16]       |
| 45  | <i>Dipsastraea lizardensis</i>  | 6824R4    | OK586188 | N.D.       | OL670823 | OK576111 | This study |
| 46  | <i>Dipsastraea cf. maritima</i> | G61912    | HQ203429 | HQ203550   | HQ203329 | HQ203258 | [16]       |
| 47  | <i>Dipsastraea matthaii</i>     | G61881    | HQ203430 | HQ203551   | HQ203330 |          | [16]       |
| 48  | <i>Dipsastraea matthaii</i>     | G61883    | HQ203431 | HQ203552   | HQ203331 | HQ203259 | [16]       |
| 49  | <i>Dipsastraea matthaii</i>     | S005      | HQ203432 | HQ203553   | HQ203332 | EU371669 | [16]       |
| 50  | <i>Dipsastraea matthaii</i>     | S029      | HQ203433 | HQ203554   | HQ203333 | EU371671 | [16]       |
| 51  | <i>Dipsastraea matthaii</i>     | 471T15    | OK586189 | OK556591   | OL670824 | OK576112 | This study |
| 52  | <i>Dipsastraea maxima</i>       | S052      | HQ203434 | HQ203555   | HQ203334 | EU371674 | [16]       |
| 53  | <i>Dipsastraea maxima</i>       | P142      | HQ203435 | HQ203556   |          | HQ203260 | [16]       |
| 54  | <i>Dipsastraea cf. maxima</i>   | P134      | HQ203436 | HQ203557   | HQ203335 | HQ203261 | [16]       |
| 55  | <i>Dipsastraea pallida</i>      | G61898    | HQ203437 | HQ203558   | HQ203336 |          | [16]       |
| 56  | <i>Dipsastraea pallida</i>      | S036      | HQ203438 | HQ203559   | HQ203337 | EU371675 | [16]       |
| 57  | <i>Dipsastraea rosaria</i>      | G61911    | HQ203439 | HQ203560   | HQ203338 | HQ203262 | [16]       |

| No. | Species                       | Sample ID | 28S rDNA | histone H3 | ITS rDNA | mt COI   | Reference  |
|-----|-------------------------------|-----------|----------|------------|----------|----------|------------|
| 58  | <i>Dipsastraea rotumana</i>   | S068      | HQ203440 | HQ203561   | HQ203339 | FJ345427 | [16]       |
| 59  | <i>Dipsastraea rotumana</i>   | 471T19    | OK586190 | OK556592   | OL670825 | OK576113 | This study |
| 60  | <i>Dipsastraea speciosa</i>   | S001      | HQ203443 | HQ203564   | HQ203341 | EU371677 | [16]       |
| 61  | <i>Dipsastraea speciosa</i>   | S026      | HQ203444 | HQ203565   |          | EU371680 | [16]       |
| 62  | <i>Dipsastraea speciosa</i>   | P103      | HQ203445 | HQ203566   | HQ203342 | HQ203264 | [16]       |
| 63  | <i>Dipsastraea truncatus</i>  | G61897    | HQ203447 | HQ203568   | HQ203344 | HQ203266 | [16]       |
| 64  | <i>Echinopora gemmacea</i>    | S120      | HQ203411 | HQ203532   | HQ203316 | FJ345418 | [16]       |
| 65  | <i>Echinopora horrida</i>     | G61907    | HQ203412 | HQ203533   | HQ203317 | HQ203253 | [16]       |
| 66  | <i>Echinopora lamellosa</i>   | S109      | HQ203413 | HQ203534   | HQ203318 | FJ345419 | [16]       |
| 67  | <i>Echinopora mammiformis</i> | G61884    | HQ203414 | HQ203535   | HQ203319 | HQ203254 | [16]       |
| 68  | <i>Echinopora pacificus</i>   | S110      | HQ203415 | HQ203536   | HQ203320 | FJ345420 | [16]       |
| 69  | <i>Favites abdita</i>         | S002      | HQ203448 | HQ203569   | HQ203345 | HQ203267 | [16]       |
| 70  | <i>Favites chinensis</i>      | S084      | HQ203449 | HQ203570   | HQ203346 | HQ203268 | [16]       |
| 71  | <i>Favites colemani</i>       | P118      | HQ203482 | HQ203603   |          | HQ203284 | [16]       |
| 72  | <i>Favites complanata</i>     | S007      | HQ203450 | HQ203571   | HQ203347 | EU371689 | [16]       |
| 73  | <i>Favites flexuosa</i>       | P116      | HQ203451 | HQ203572   | HQ203348 | HQ203269 | [16]       |
| 74  | <i>Favites flexuosa</i>       | 4720R1    | OK586192 | OK556594   | OL670827 | OK576115 | This study |
| 75  | <i>Favites halicora</i>       | S115      | HQ203452 | HQ203573   | HQ203349 | HQ203270 | [16]       |
| 76  | <i>Favites magnistellata</i>  | G61896    | HQ203485 | HQ203606   | HQ203371 | HQ203287 | [16]       |
| 77  | <i>Favites magnistellata</i>  | P109      | HQ203486 | HQ203607   |          | HQ203288 | [16]       |

| No. | Species                      | Sample ID | 28S rDNA | histone H3 | ITS rDNA | mt COI   | Reference  |
|-----|------------------------------|-----------|----------|------------|----------|----------|------------|
| 78  | <i>Favites magnistellata</i> | 471T24    | OK586225 | OK556624   | OL670858 | OK576145 | This study |
| 79  | <i>Favites magnistellata</i> | 4719R3    | OK586248 | OK556645   | N.D.     | OK576167 | This study |
| 80  | <i>Favites paraflxuosa</i>   | S100      | HQ203453 | HQ203574   | HQ203350 | EU371694 | [16]       |
| 81  | <i>Favites pentagona</i>     | S086      | HQ203454 | HQ203575   | HQ203351 | EU371695 | [16]       |
| 82  | <i>Favites pentagona</i>     | P111      | HQ203455 | HQ203576   |          | HQ203271 | [16]       |
| 83  | <i>Favites pentagona</i>     | 471T22    | OK586220 | OK556619   | OL670853 | OK576140 | This study |
| 84  | <i>Favites pentagona</i>     | 471T23    | OK586207 | OK556609   | OL670842 | OK576129 | This study |
| 85  | <i>Favites pentagona</i>     | 4718R6    | OK586211 | OK556613   | OL670846 | OK576132 | This study |
| 86  | <i>Favites pentagona</i>     | 4718R7    | OK586221 | OK556620   | OL670854 | OK576141 | This study |
| 87  | <i>Favites pentagona</i>     | 583R3     | OK586212 | OK556614   | OL670847 | OK576133 | This study |
| 88  | <i>Favites pentagona</i>     | 583R12    | OK586201 | OK556603   | OL670836 | OK576124 | This study |
| 89  | <i>Favites pentagona</i>     | 6727R5    | OK586213 | OK556615   | OL670848 | N.D.     | This study |
| 90  | <i>Favites rotundata</i>     | G61874    | HQ203441 | HQ203562   | HQ203340 | HQ203263 | [16]       |
| 91  | <i>Favites rotundata</i>     | P132      | HQ203442 | HQ203563   |          |          | [16]       |
| 92  | <i>Favites russelli</i>      | G61895    | HQ203456 | HQ203577   | HQ203352 | HQ203272 | [16]       |
| 93  | <i>Favites stylifera</i>     | P128      | HQ203457 | HQ203578   | HQ203353 | HQ203273 | [16]       |
| 94  | <i>Favites stylifera</i>     | 4819R5    | OK586223 | OK556622   | OL670856 | OK576143 | This study |
| 95  | <i>Favites stylifera</i>     | 6819R5    | OK586224 | OK556623   | OL670857 | OK576144 | This study |
| 96  | <i>Favites valenciennesi</i> | G61904    | HQ203489 | HQ203610   |          | HQ203291 | [16]       |
| 97  | <i>Favites valenciennesi</i> | S006      | HQ203490 | HQ203611   | HQ203374 | EU371713 | [16]       |

| No. | Species                       | Sample ID | 28S rDNA | histone H3 | ITS rDNA | mt COI   | Reference  |
|-----|-------------------------------|-----------|----------|------------|----------|----------|------------|
| 98  | <i>Favites valenciennesi</i>  | S008      | HQ203491 | HQ203612   |          | EU371714 | [16]       |
| 99  | <i>Favites valenciennesi</i>  | P102      | HQ203492 | HQ203613   | HQ203375 | HQ203292 | [16]       |
| 100 | <i>Favites valenciennesi</i>  | 471T14    | OK586226 | OK556625   | OL670860 | OK576147 | This study |
| 101 | <i>Favites valenciennesi</i>  | 4719R1    | N.D.     | OK556659   | OL670861 | OK576148 | This study |
| 102 | <i>Goniastrea edwardsi</i>    | S045      | HQ203462 | HQ203583   | HQ203357 | EU371697 | [16]       |
| 103 | <i>Goniastrea edwardsi</i>    | S117      | HQ203463 | HQ203584   |          | FJ345432 | [16]       |
| 104 | <i>Goniastrea favulus</i>     | G61877    | HQ203464 | HQ203585   | HQ203358 |          | [16]       |
| 105 | <i>Goniastrea favulus</i>     | S022      | HQ203465 | HQ203586   |          | EU371698 | [16]       |
| 106 | <i>Goniastrea pectinata</i>   | G61879    | HQ203467 | HQ203588   | HQ203360 |          | [16]       |
| 107 | <i>Goniastrea pectinata</i>   | S043      | HQ203468 | HQ203589   |          | FJ345434 | [16]       |
| 108 | <i>Goniastrea pectinata</i>   | P110      | HQ203469 | HQ203590   |          |          | [16]       |
| 109 | <i>Goniastrea retiformis</i>  | S083      | HQ203470 | HQ203591   | HQ203361 | EU371700 | [16]       |
| 110 | <i>Goniastrea retiformis</i>  | P119      | HQ203471 | HQ203592   |          | HQ203275 | [16]       |
| 111 | <i>Dipsastraea stelligera</i> | P141      | HQ203446 | HQ203567   | HQ203343 | HQ203265 | [16]       |
| 112 | <i>Hydnophora exesa</i>       | P127      | HQ203472 | HQ203593   | HQ203362 | HQ203276 | [16]       |
| 113 | <i>Hydnophora microconos</i>  | P121      | HQ203473 | HQ203594   | HQ203363 | HQ203277 | [16]       |
| 114 | <i>Hydnophora pilosa</i>      | P138      | HQ203474 | HQ203595   | HQ203364 | HQ203278 | [16]       |
| 115 | <i>Leptoria irregularis</i>   | P133      | HQ203475 | HQ203596   |          | HQ203279 | [16]       |
| 116 | <i>Leptoria phrygia</i>       | S081      | HQ203476 | HQ203597   | HQ203365 | EU371705 | [16]       |
| 117 | <i>Merulina ampliata</i>      | P106      | HQ203477 | HQ203598   |          | HQ203280 | [16]       |

| No. | Species                                   | Sample ID | 28S rDNA | histone H3 | ITS rDNA | mt COI   | Reference  |
|-----|-------------------------------------------|-----------|----------|------------|----------|----------|------------|
| 118 | <i>Merulina scabricula</i>                | P114      | HQ203478 | HQ203599   | HQ203366 | HQ203281 | [16]       |
| 119 | <i>Mycedium elephantotus</i>              | S121      | HQ203494 | HQ203615   | HQ203377 | HQ203294 | [16]       |
| 120 | <i>Mycedium elephantotus</i>              | 584R2     | OK586244 | OK556641   | OL670891 | N.D.     | This study |
| 121 | <i>Mycedium mancaoi</i>                   | 4817R2    | OK586242 | OK556639   | OL670874 | OK576162 | This study |
| 122 | <i>Mycedium robokaki</i>                  | S126      | HQ203495 | HQ203616   | HQ203378 | HQ203295 | [16]       |
| 123 | <i>Mycedium robokaki</i>                  | 4817R3    | OK586243 | OK556640   | OL670875 | OK576163 | This study |
| 124 | <i>Orbicella annularis</i>                | A622      | HQ203479 | HQ203600   | HQ203367 | HQ203282 | [16]       |
| 125 | <i>Oulophyllia bennettiae</i>             | G61873    | HQ203496 | HQ203617   |          | HQ203296 | [16]       |
| 126 | <i>Oulophyllia bennettiae</i>             | S033      | HQ203497 | HQ203618   | HQ203379 | FJ345436 | [16]       |
| 127 | <i>Oulophyllia</i> aff. <i>bennettiae</i> | P140      | HQ203498 | HQ203619   | HQ203380 | HQ203297 | [16]       |
| 128 | <i>Oulophyllia crispa</i>                 | S055      | HQ203499 | HQ203620   | HQ203381 | EU371721 | [16]       |
| 129 | <i>Paragoniastrea australensis</i>        | G61876    | HQ203459 | HQ203580   | HQ203355 | HQ203274 | [16]       |
| 130 | <i>Paragoniastrea australensis</i>        | S088      | HQ203460 | HQ203581   | HQ203356 | FJ345431 | [16]       |
| 131 | <i>Paragoniastrea australensis</i>        | S098      | HQ203461 | HQ203582   |          | EU371696 | [16]       |
| 132 | <i>Paragoniastrea australensis</i>        | 4819R2    | OK586230 | OK556628   | OL670863 | OK576151 | This study |
| 133 | <i>Paragoniastrea australensis</i>        | 6819R13   | OK586231 | OK556629   | OL670864 | OK576152 | This study |
| 134 | <i>Paragoniastrea australensis</i>        | 6821R19   | OK586232 | OK556630   | OL670865 | OK576153 | This study |
| 135 | <i>Paragoniastrea australensis</i>        | 6821R25   | OK586233 | OK556631   | OL670866 | OK576154 | This study |
| 136 | <i>Paragoniastrea australensis</i>        | 6821R18   | OK586234 | OK556632   | OL670867 | OK576155 | This study |
| 137 | <i>Paragoniastrea deformis</i>            | 6725R14   | OK586238 | OK556636   | OL670871 | OK576159 | This study |

| No. | Species                          | Sample ID | 28S rDNA | histone H3 | ITS rDNA | mt COI   | Reference  |
|-----|----------------------------------|-----------|----------|------------|----------|----------|------------|
| 138 | <i>Paragoniastrea deformis</i>   | 6726R23   | OK586237 | OK556635   | OL670870 | OK576158 | This study |
| 139 | <i>Paragoniastrea deformis</i>   | 6724R12   | OK586239 | OK556637   | OL670872 | OK576160 | This study |
| 140 | <i>Paragoniastrea deformis</i>   | 583R9     | OK586240 | N.D.       | OL670890 | N.D.     | This study |
| 141 | <i>Paragoniastrea deformis</i>   | 6724R7    | OK586241 | OK556638   | OL670873 | OK576161 | This study |
| 142 | <i>Paragoniastrea deformis</i>   | 4716R3    | OK586222 | OK556621   |          | OK576142 | This study |
| 143 | <i>Paramontastraea salebrosa</i> | P139      | HQ203488 | HQ203609   | HQ203373 | HQ203290 | [16]       |
| 144 | <i>Pectinia alcornis</i>         | P124      | HQ203500 | HQ203621   | HQ203382 | HQ203298 | [16]       |
| 145 | <i>Pectinia aylei</i>            | S122      | HQ203501 | HQ203622   | HQ203383 | HQ203299 | [16]       |
| 146 | <i>Pectinia lactuca</i>          | P115      | HQ203502 | HQ203623   | HQ203384 | HQ203300 | [16]       |
| 147 | <i>Pectinia lactuca</i>          | 4820R3    | N.D.     | N.D.       | N.D.     | OK576164 | This study |
| 148 | <i>Pectinia paeonia</i>          | P126      | HQ203503 | HQ203624   | HQ203385 | HQ203301 | [16]       |
| 149 | <i>Pectinia paeonia</i>          | 4820R1    | OK586245 | OK556642   | N.D.     | N.D.     | This study |
| 150 | <i>Platygyra acuta</i>           | P123      | HQ203504 | HQ203625   | HQ203386 |          | [16]       |
| 151 | <i>Platygyra contorta</i>        | P112      | HQ203505 | HQ203626   | HQ203387 |          | [16]       |
| 152 | <i>Platygyra daedalea</i>        | G61878    | HQ203506 | HQ203627   |          |          | [16]       |
| 153 | <i>Platygyra daedalea</i>        | S116      | HQ203507 | HQ203628   | HQ203388 | FJ345440 | [16]       |
| 154 | <i>Platygyra daedalea</i>        | 6819R10   | OK586246 | OK556643   | OL670876 | OK576165 | This study |
| 155 | <i>Platygyra lamellina</i>       | G61887    | HQ203508 | HQ203629   | HQ203389 | HQ203302 | [16]       |
| 156 | <i>Platygyra lamellina</i>       | S114      | HQ203509 | HQ203630   |          | FJ345441 | [16]       |
| 157 | <i>Platygyra lamellina</i>       | 4718R2    | OK586247 | OK556644   | OL670877 | OK576166 | This study |

| No. | Species                        | Sample ID | 28S rDNA | histone H3 | ITS rDNA | mt COI   | Reference  |
|-----|--------------------------------|-----------|----------|------------|----------|----------|------------|
| 158 | <i>Platygyra lamellina</i>     | 4819R3    | OK586249 | OK556646   | OL670878 | OK576168 | This study |
| 159 | <i>Platygyra pini</i>          | G61899    | HQ203510 | HQ203631   | HQ203390 | HQ203303 | [16]       |
| 160 | <i>Platygyra pini</i>          | S035      | HQ203511 | HQ203632   | HQ203391 | FJ345443 | [16]       |
| 161 | <i>Platygyra pini</i>          | 4819R1    | OK586250 | OK556647   | OL670879 | OK576169 | This study |
| 162 | <i>Platygyra pini</i>          | 4821R3    | OK586251 | OK556648   | OL670880 | OK576170 | This study |
| 163 | <i>Platygyra ryukyuensis</i>   | P101      | HQ203512 | HQ203633   | HQ203392 | HQ203304 | [16]       |
| 164 | <i>Platygyra ryukyuensis</i>   | 4819R4    | OK586252 | OK556649   | OL670881 | OK576171 | This study |
| 165 | <i>Platygyra ryukyuensis</i>   | 4821R1    | OK586253 | OK556650   | OL670882 | OK576172 | This study |
| 166 | <i>Platygyra ryukyuensis</i>   | 6728R16   | OK586254 | OK556651   | OL670883 | OK576173 | This study |
| 167 | <i>Platygyra ryukyuensis</i>   | 4816R2    | OK586255 | OK556652   | OL670884 | N.D.     | This study |
| 168 | <i>Platygyra ryukyuensis</i>   | 4820R2    | OK586256 | OK556653   | OL670885 | OK576174 | This study |
| 169 | <i>Platygyra sinensis</i>      | S118      | HQ203513 | HQ203634   | HQ203393 | FJ345442 | [16]       |
| 170 | <i>Platygyra sinensis</i>      | P130      | HQ203514 | HQ203635   |          | HQ203305 | [16]       |
| 171 | <i>Platygyra sinensis</i>      | 6821R27   | OK586257 | OK556654   | OL670886 | OK576175 | This study |
| 172 | <i>Platygyra cf. verweyi</i>   | S037      | HQ203515 | HQ203636   | HQ203394 | EU371722 | [16]       |
| 173 | <i>Platygyra cf. verweyi</i>   | 6821R9    | OK586258 | OK556655   | OL670887 | OK576176 | This study |
| 174 | <i>Platygyra cf. verweyi</i>   | 4821R2    | OK586259 | OK556656   | OL670888 | OK576177 | This study |
| 175 | <i>Platygyra cf. verweyi</i>   | 4818R1    | OK586260 | OK556657   | OL670889 | OK576178 | This study |
| 176 | <i>Scapophyllia cylindrica</i> | S060      | HQ203516 | HQ203637   | HQ203395 | FJ345444 | [16]       |
| 177 | <i>Trachyphyllia geoffroyi</i> | J001      | HQ203517 | HQ203638   | HQ203396 | HQ203306 | [16]       |

| No. | Species                                               | Sample ID | 28S rDNA | histone H3 | ITS rDNA | mt COI    | Reference |
|-----|-------------------------------------------------------|-----------|----------|------------|----------|-----------|-----------|
| 178 | <i>Montastraea multipunctata</i><br>(outgroup)        | P131      | HQ203487 | HQ203608   | HQ203372 | HQ203289  | [16]      |
| 179 | <i>Acanthastrea echinata</i><br>(Lobophyllidae-XX)    | S031      | HQ203399 | HQ203520   | HQ203308 | EU371658  | [16]      |
| 180 | <i>Moseleya latistellata</i><br>(Lobophyllidae-XX)    | G61909    | HQ203493 | HQ203614   | HQ203376 | HQ203293  | [16]      |
| 181 | <i>Diploastrea heliopora</i><br>(Diploastraeidae-XV)  | S048      | HQ203410 | HQ203531   | HQ203315 | EU371660  | [16]      |
| 182 | <i>Favia fragum</i><br>(Faviidae-XXI)                 |           | AF549222 |            |          | AB117222  | [16]      |
| 183 | <i>Lobophyllia corymbosa</i><br>(Lobophylliidae-XIX ) |           | AF549237 |            |          | AB117241  | [16]      |
| 184 | <i>Montastraea cavernosa</i><br>(Montastraeidae-XVI)  | A005      | HQ203480 | HQ203601   | HQ203368 | HQ203283  | [16]      |
| 185 | <i>Mussa angulosa</i> (Faviidae-XXI)                  |           | AF549236 |            | AB441402 | NC_008163 | [16]      |
| 186 | <i>Plesiastrea versipora</i><br>(Plesiastreidae-XIV)  | S127      | HQ203397 | HQ203518   | HQ203307 | HQ203246  | [16]      |
| 187 | <i>Plesiastrea versipora</i><br>(Plesiastreidae-XIV)  | P137      | HQ203398 | HQ203519   |          | HQ203247  | [16]      |

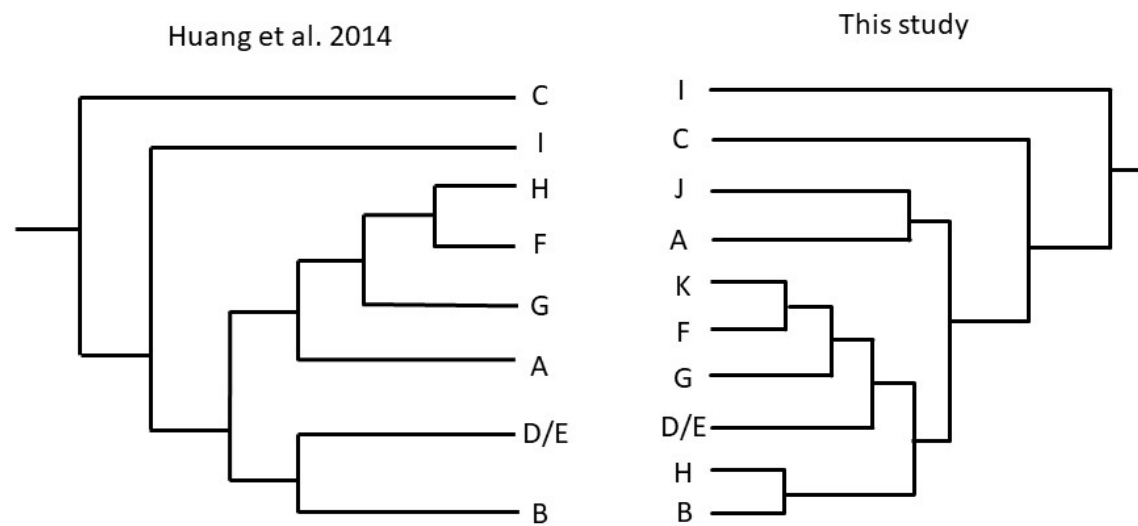

Figure S1. Phylogeny of Merulinidae reconstructed from Huang et al. [10] and this study.
